# Supplementary material for: Prognostic Value of the Radiographic Assessment of Lung Edema Score in Mechanically Ventilated ICU Patients
Source: J Clin Med. 2023 Feb 4;12(4):1252. doi: 10.3390/jcm12041252 (PMC9960783; doi:10.3390/jcm12041252)
Supplement: Supplementary file 1 [file jcm-12-01252-s001.zip › jcm-2149384-supplementary.pdf]

# **Prognostic Value of the Radiographic Assessment of Lung Edema Score in Mechanically Ventilated ICU Patients**

Daan F.L. Filippini, Laura A. Hagens, Nanon F.L. Heijnen, Claudio Zimatore, Leila N. Atmowihardjo, Ronny M. Schnabel, Marcus J. Schultz, Dennis C.J.J. Bergmans, Lieuwe D.J. Bos, Marry R. Smit

## **Supplementary Materials**

### **Table of contents**

|                                                                                             |   |
|---------------------------------------------------------------------------------------------|---|
| Table S1. Admission characteristics stratified by ARDS.....                                 | 1 |
| Table S2. Distribution of baseline RALE scores .....                                        | 2 |
| Figure S1. Correlation plots of baseline RALE and PaO <sub>2</sub> / FiO <sub>2</sub> ..... | 3 |
| Figure S2. Baseline RALE scores and $\Delta$ RALE (90-day mortality). ....                  | 4 |
| Table S3. Baseline RALE (90-day mortality) .....                                            | 5 |
| Figure S3a. Baseline RALE score and 30-day mortality. ....                                  | 6 |
| Figure S3b. Baseline RALE score and 90-day mortality .....                                  | 6 |
| Table S4. $\Delta$ RALE and 90d mortality .....                                             | 7 |

**Table S1.** Admission characteristics stratified by ARDS subgroup.

|                                            | No ARDS              | Non-COVID-ARDS       | COVID-ARDS           | p      |
|--------------------------------------------|----------------------|----------------------|----------------------|--------|
| n                                          | 265                  | 109                  | 48                   |        |
| <b>Demographics</b>                        |                      |                      |                      |        |
| Age (years, mean (SD))                     | 61.66 (14.86)        | 63.03 (12.95)        | 63.54 (11.20)        | 0.546  |
| Male (%)                                   | 179 (67.5)           | 78 (71.6)            | 33 (68.8)            | 0.749  |
| BMI (kg m <sup>-2</sup> )                  | 25.99 [22.87, 29.39] | 26.15 [23.57, 29.47] | 27.92 [24.90, 33.06] | 0.014  |
| <b>History</b>                             |                      |                      |                      |        |
| COPD (%)                                   | 28 (10.6)            | 8 (7.3)              | 2 (4.2)              | 0.282  |
| Chronic respiratory failure (%)            | 2 (0.8)              | 3 (2.8)              | 0 (0.0)              | 0.194  |
| Renal failure (%)                          | 22 (8.3)             | 6 (5.5)              | 3 (6.2)              | 0.612  |
| Cardiac failure (%)                        | 45 (17.0)            | 4 (3.7)              | 4 (8.3)              | 0.001  |
| <b>Admission type</b>                      |                      |                      |                      |        |
| Admission type (%)                         |                      |                      |                      | <0.001 |
| Emergency surgical                         | 46 (17.4)            | 13 (11.9)            | 1 (2.1)              |        |
| Medical                                    | 176 (66.4)           | 84 (77.1)            | 47 (97.9)            |        |
| Planned surgical                           | 43 (16.2)            | 12 (11.0)            | 0 (0.0)              |        |
| Neurosurgery (%)                           | 45 (17.0)            | 6 (5.5)              | 0 (0.0)              | <0.001 |
| High risk surgery (%)                      |                      |                      |                      | <0.001 |
| Acute abdomen                              | 8 (8.9)              | 7 (26.9)             | 0 (0.0)              |        |
| Aortic vascular                            | 24 (26.7)            | 5 (19.2)             | 0 (0.0)              |        |
| Cardiac                                    | 22 (24.4)            | 3 (11.5)             | 0 (0.0)              |        |
| Other                                      | 34 (37.8)            | 10 (38.5)            | 0 (0.0)              |        |
| <b>Admission characteristics</b>           |                      |                      |                      |        |
| Active malignancy (%)                      | 24 (9.1)             | 21 (19.3)            | 4 (8.3)              | 0.015  |
| Immunoincompetence (%)                     | 13 (4.9)             | 8 (7.3)              | 3 (6.2)              | 0.642  |
| Shock (%)                                  | 27 (10.2)            | 11 (10.1)            | 1 (2.1)              | 0.191  |
| Extrapulmonary sepsis (%)                  | 29 (10.9)            | 19 (17.4)            | 1 (2.1)              | 0.019  |
| Pancreatitis (%)                           | 3 (1.1)              | 4 (3.7)              | 0 (0.0)              | 0.138  |
| Chemotherapy (%)                           | 8 (3.0)              | 6 (5.5)              | 2 (4.2)              | 0.514  |
| Aspiration (%)                             | 22 (8.3)             | 16 (14.7)            | 1 (2.1)              | 0.029  |
| <b>Respiration at inclusion</b>            |                      |                      |                      |        |
| FiO <sub>2</sub> (% , median [IQR])        | 30 [25, 40]          | 40 [31, 55]          | 51 [44, 69]          | <0.001 |
| PEEP (cmH <sub>2</sub> O)                  | 7 [5, 8]             | 10 [8, 12]           | 10 [10, 12]          | <0.001 |
| TV per IBW (mL kg <sup>-1</sup> )          | 7.05 [6.15, 8.53]    | 7.24 [6.10, 8.63]    | 7.21 [6.03, 8.56]    | 0.837  |
| Respiratory Rate (min <sup>-1</sup> )      | 18 [15, 22]          | 20 [16, 26]          | 21 [16, 26]          | <0.001 |
| Driving Pressure (cmH <sub>2</sub> O)      | 13 [9, 17]           | 16 [10, 19]          | 15 [9, 18]           | 0.004  |
| <b>Severity</b>                            |                      |                      |                      |        |
| PaO <sub>2</sub> / FiO <sub>2</sub> (mmHg) | 233 [154, 325]       | 126 [97, 180]        | 105 [80, 137]        | <0.001 |
| APACHE II score                            | 20 [15, 26]          | 20 [15, 25]          | 18.50 [13, 22]       | 0.040  |
| ECMO (%)                                   | 18 (6.8)             | 3 (2.8)              | 0 (0.0)              | 0.064  |
| SOFA score                                 | 9 [7, 11]            | 9 [7, 12]            | 7 [6, 9]             | <0.001 |

Data is expressed as median [IQR], except for categorical variables (mean (%)) and age (mean (SD)).  
 BMI = Body Mass Index, COPD = Chronic Obstructive Pulmonary Disease, PEEP = Positive End-Expiratory Pressure, TV = Tidal Volume, IBW = Ideal Body Weight, ECMO = Extracorporeal Membrane Oxygenation

**Table S2.** Distribution of baseline RALE scores

|                     | n   | Baseline RALE |
|---------------------|-----|---------------|
| Entire study cohort | 422 | 15 [8, 21]    |
| No ARDS             | 265 | 12 [7, 18]    |
| Non-COVID-ARDS      | 127 | 20 [15, 28]   |
| COVID-ARDS          | 63  | 20 [15, 28]   |
| Mild ARDS           | 23  | 20 [14, 24]   |
| Moderate ARDS       | 83  | 20 [15, 27.5] |
| Severe ARDS         | 51  | 20 [14, 28.5] |

Data are displayed as median [IQR]. Data are displayed for the entire study cohort and for different patient subgroups.

**Figure S1.** Correlation plots of baseline RALE and  $\text{PaO}_2 / \text{FiO}_2$ . In all patients (left) and ARDS patients only (right).

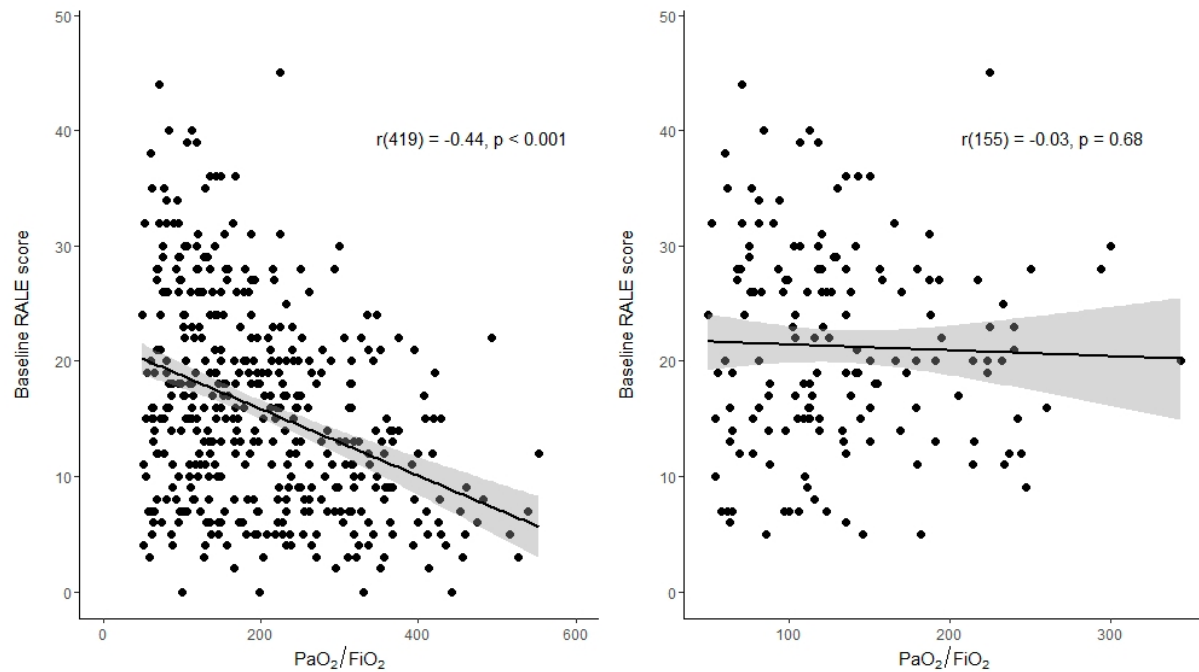

Individual patient data points are displayed as dots. On the x-axis,  $\text{PaO}_2 / \text{FiO}_2$  is displayed in mmHg and on the y-axis the corresponding baseline RALE scores. The annotated text represents Pearson correlation coefficients and are displayed as “ $r(n) = \text{correlation coefficient}, p\text{-value}$ ”

**Figure S2.** Baseline RALE scores and  $\Delta$ RALE (90-day mortality).

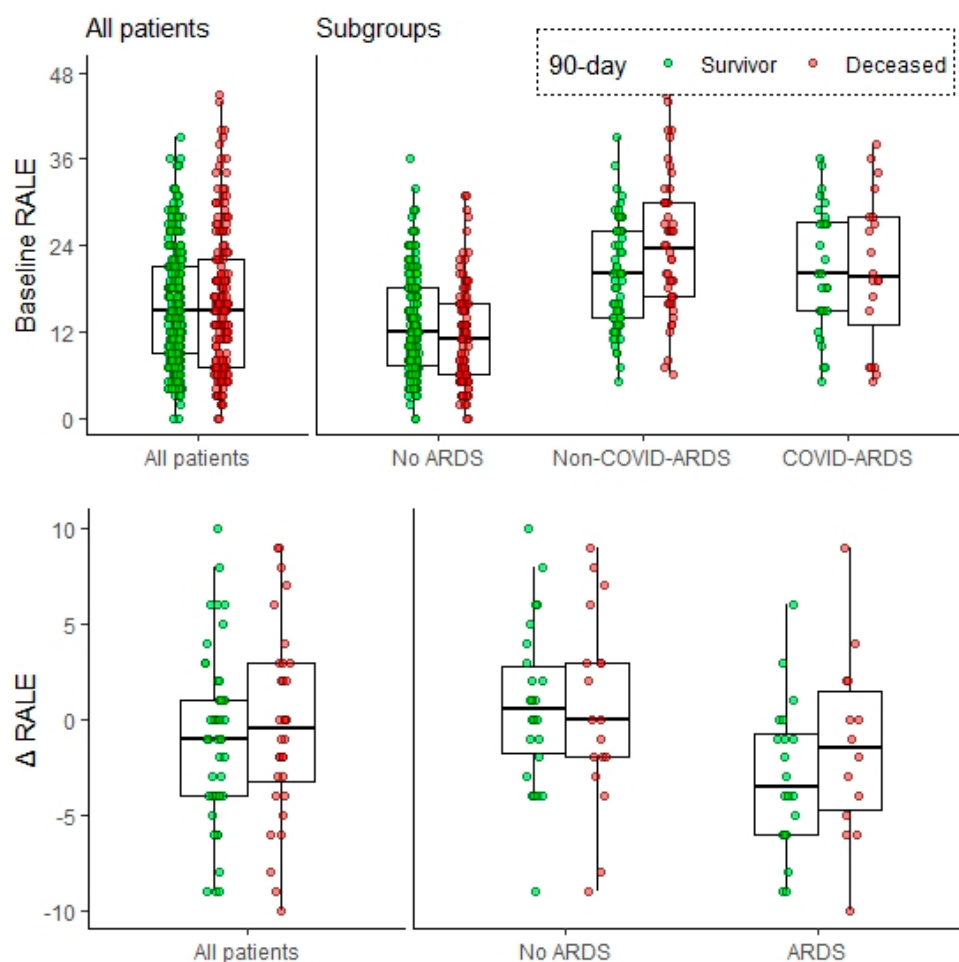

Data are stratified and colored by 90-day mortality in the entire study cohort and in predefined ARDS subgroups (ARDS COVID, ARDS non-COVID, no ARDS). As there were only 5 COVID-ARDS patients with an additional day 1 CXR available, COVID-ARDS and non-COVID-ARDS were combined into ARDS when looking at  $\Delta$ RALE. Individual patient data points are plotted as dots. RALE = radiographic assessment of lung edema, ARDS = acute respiratory distress syndrome,  $\Delta$ RALE = early change in RALE score (RALE day 1 – RALE baseline).

**Table S3.** Baseline RALE (90-day mortality)

|                                                                                 | All patients<br>n = 422 |       | No ARDS<br>n = 265 |       | non-COVID ARDS<br>n = 109 |              | COVID ARDS<br>n = 48 |       |
|---------------------------------------------------------------------------------|-------------------------|-------|--------------------|-------|---------------------------|--------------|----------------------|-------|
|                                                                                 | HR (CI)                 | p     | HR (CI)            | p     | HR (CI)                   | p            | HR (CI)              | p     |
| <b>Univariable analyses</b>                                                     |                         |       |                    |       |                           |              |                      |       |
| Baseline RALE*                                                                  | 1.01 (0.98 - 1.03)      | 0.542 | 0.97 (0.94 - 1.01) | 0.139 | <u>1.06 (1.01 - 1.11)</u> | <u>0.015</u> | 1 (0.94 - 1.06)      | 0.971 |
| <b>Multivariable analyses (adjusted for confounders: age, gender Apache II)</b> |                         |       |                    |       |                           |              |                      |       |
| Baseline RALE*                                                                  | 1 (0.98 - 1.03)         | 0.713 | 0.96 (0.93 - 1)    | 0.061 | <u>1.06 (1.01 - 1.12)</u> | <u>0.014</u> | 1.02 (0.94 - 1.1)    | 0.64  |

Data are displayed for all patients and predefined subgroups (No ARDS, non-COVID-ARDS, COVID-ARDS). Values are derived by logistic regression and are displayed as OR (95% CI) increase per 1 point increment of predictor variable. RALE = Radiographic assessment of lung edema, OR = Odds ratio, CI = Confidence interval, ARDS = Acute respiratory distress syndrome, COVID = Coronavirus disease 2019.

**Figure S3a.** Baseline RALE score and 30-day mortality.

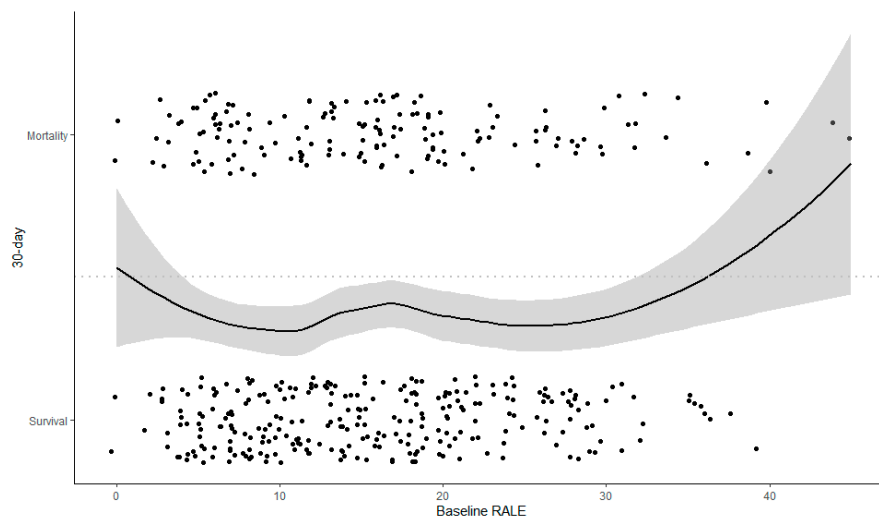

Individual patient data points are displayed as dots. On the x-axis, baseline RALE scores are displayed and on the y-axis 30-day mortality is jittered. The black trend line is derived by means of LOESS regression, with the 95% CI in gray.

**Figure S3b.** Baseline RALE score and 90-day mortality

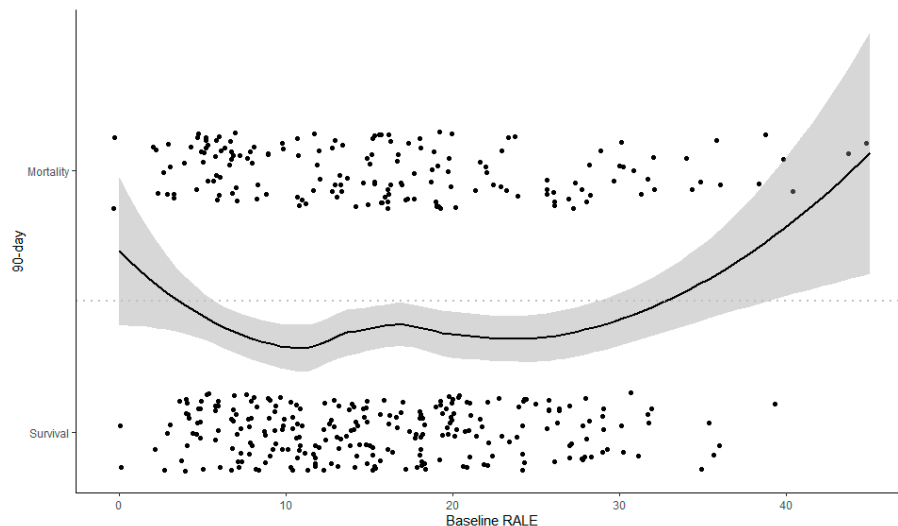

Individual patient data points are displayed as dots. On the x-axis, baseline RALE scores are displayed and on the y-axis 30-day mortality is jittered. The black trend line is derived by means of LOESS regression, with the 95% CI in gray.

**Table S4.**  $\Delta$ RALE and 90d mortality

|                                                           | All patients<br>n = 84 |       | No ARDS<br>n = 48  |       | ARDS<br>n = 36      |       |
|-----------------------------------------------------------|------------------------|-------|--------------------|-------|---------------------|-------|
|                                                           | HR (CI)                | p     | HR (CI)            | p     | HR (CI)             | p     |
| <b>Univariable analyses</b>                               |                        |       |                    |       |                     |       |
| $\Delta$ RALE*                                            | 1 (0.93 - 1.07)        | 0.995 | 0.99 (0.9 - 1.09)  | 0.837 | 1.01 (0.91 - 1.12)  | 0.845 |
| $\Delta$ RALE > 0                                         | 1.05 (0.38 – 2.86)     | 1     | 0.78 (0.21 – 2.9)  | 0.771 | 1.77 (0.27 – 11.85) | 0.683 |
| <b>Multivariable analyses (corrected for confounders)</b> |                        |       |                    |       |                     |       |
| $\Delta$ RALE *                                           | 1.02 (0.94 - 1.09)     | 0.677 | 0.99 (0.89 - 1.1)  | 0.882 | 1.14 (0.99 - 1.34)  | 0.079 |
| $\Delta$ RALE > 0                                         | 1.07 (0.41 - 2.78)     | 0.895 | 0.76 (0.21 - 2.62) | 0.661 | 4.26 (0.62 - 39.01) | 0.158 |

Data are displayed for all patients and predefined subgroups. As the number of COVID patients with day 1 data available was low (n=5), COVID-ARDS and Non-COVID-ARDS were combined into ARDS. Values are displayed as OR (95% CI), and are derived by means of Fisher exact test (categorical predictor) or logistic regression (continuous/mixed predictors). \* = OR represents increase per 1 point increment of predictor. RALE = Radiographic assessment of lung edema,  $\Delta$ RALE = Early changes in RALE score, OR = Odds ratio, CI = Confidence interval, ARDS = Acute respiratory distress syndrome, COVID = Coronavirus disease 2019.
